1 **Next-generation sequencing based hospital outbreak investigation yields insight**  
2 **into *Klebsiella aerogenes* population structure and determinants of carbapenem**  
3 **resistance and virulence**

4

5 Adel Malek<sup>1</sup>, Kelly McGlynn<sup>1</sup>, Samantha Taffner<sup>1</sup>, Lynn Fine<sup>3</sup>, Brenda Tesini<sup>4</sup>, Jun  
6 Wang<sup>1</sup>, Heba Mostafa<sup>1</sup>, Sharon Petry<sup>1</sup>, Archibald Perkins<sup>1</sup>, Paul Graman<sup>4</sup>, Dwight  
7 Hardy<sup>1,2</sup>, and Nicole Pecora<sup>1,#</sup>

8

9 <sup>1</sup>Department of Pathology and Laboratory Medicine, University of Rochester Medical  
10 Center, New York, USA

11 <sup>2</sup>Department of Microbiology and Immunology, University of Rochester Medical Center,  
12 New York, USA

13 <sup>3</sup>Infection Prevention Program, University of Rochester Medical Center, New York

14 <sup>4</sup>Department of Medicine, Infectious Diseases Division, University of Rochester Medical  
15 Center, New York, USA

16

17 **Running title:** Carbapenem-resistant *Klebsiella aerogenes* outbreak

18

19 **#Correspondence to:**

20 Nicole Pecora, MD, PhD

21 University of Rochester Medical Center

22 601 Elmwood Avenue, Rochester, NY-14642, USA

23 Phone: (585) 276-4674, Email: [nicole\\_pecora@urmc.rochester.edu](mailto:nicole_pecora@urmc.rochester.edu)

24

25 **KEY WORDS**

26 Carbapenem resistant *Klebsiella aerogenes*, whole-genome sequencing, cardiothoracic  
27 intensive care unit, outbreak, AmpC  $\beta$ -lactamases, porins, Omp36, integrative  
28 conjugative elements, AmpD, yersiniabactin, colibactin, ST4, MLST, genomic  
29 epidemiology.

30

31

32

33

34

35

36

37

38

39

40

41

42

43

44

45

46

47

48

49 **ABSTRACT**

50 *Klebsiella aerogenes* is a nosocomial pathogen associated with drug resistance  
51 and outbreaks in intensive care units. In a 5-month period in 2017, we experienced an  
52 increased incidence of cultures for carbapenem-resistant *K. aerogenes* (CR-KA) from  
53 an adult cardiothoracic intensive care unit (CICU) involving 15 patients. Phylogenomic  
54 analysis following whole-genome sequencing (WGS) identified the outbreak CR-KA  
55 isolates to group together as a tight clonal cluster (<7 SNPs apart), suggestive of a  
56 protracted intra-ward transmission event. No clonal relationships were identified  
57 between the CICU CR-KA strains and additional hospital CR-KA patient isolates from  
58 different wards and/or previous years. Genes encoding carbapenemases or drug-  
59 resistant plasmids were absent in the outbreak strains, and carbapenem resistance was  
60 attributed to mutations impacting AmpD activity and membrane permeability. The CICU  
61 outbreak strains harbored an integrative conjugative element (ICEKp10), which has  
62 been associated with pathogenicity in hypervirulent *Klebsiella pneumoniae* lineages.  
63 Comparative genomics with global *K. aerogenes* genomes showed our outbreak strains  
64 to group closely with global ST4 strains, which along with ST93 likely represent  
65 dominant *K. aerogenes* lineages associated with human infections. WGS is a powerful  
66 tool that goes beyond high-resolution tracking of transmission events into identifying the  
67 genetic basis of drug-resistance and virulence, which are not part of conventional  
68 diagnostic workflows. With an increasing availability of sequenced genomes from  
69 across the globe, population structure analysis offers opportunities to identify emerging  
70 trends and dominant clones associated with specific syndromes and geographical  
71 locations for poorly characterized pathogens.

72

## 73 INTRODUCTION

74 *Klebsiella aerogenes* (formerly described as *Enterobacter aerogenes*) is a  
75 ubiquitous member of the *Enterobacteriaceae* family and a significant nosocomial  
76 pathogen associated with drug resistance and a wide variety of infections including  
77 pneumonia, bacteremia, urinary tract and surgical site infections (1, 2). In vulnerable  
78 patients, *K. aerogenes* infections can arise endogenously (gastrointestinal flora) or be  
79 acquired from surroundings in the facility where the patient is admitted (horizontal  
80 transmission through colonized healthcare workers, contaminated devices/shared  
81 equipment, other patients etc.), with the most critical risk factor for acquiring infection  
82 being prolonged broad-spectrum antibiotic administration. Additional risk factors for *K.*  
83 *aerogenes* infections include prolonged stay at healthcare facilities especially ICUs and  
84 neonatal wards, complex underlying medical conditions, immunosuppression and  
85 mechanical ventilation or the presence of foreign devices. Numerous hospital ward  
86 outbreaks in both pediatric and adult populations due to *K. aerogenes* have been  
87 described due to a common source or spread via patient-to-patient transmission (1, 2).  
88 A particularly high frequency of hospital ICU outbreaks was continually reported from  
89 Western Europe in a period between the 1990s and early 2000s, that were largely  
90 attributed to the spread and endemic establishment of a clonal *K. aerogenes* strain  
91 harboring the extended-spectrum B-lactamase TEM-24 (*bla*<sub>TEM-24</sub>) (2).

92 Within the US and other regions across the globe, *K. aerogenes* has also been  
93 reported along with *Klebsiella pneumoniae*, *Enterobacter cloacae* and *Escherichia coli*  
94 to be among the frequently isolated carbapenem resistant *Enterobacteriaceae* (3-5).  
95 Clinical CR-KA strains harboring plasmid-borne serine carbapenemases have been

96 described in the US and worldwide, while metallo- $\beta$ -lactamases and OXA- 48 have  
97 been reported in Europe, Asia and Brazil (2). However, the primary mechanisms  
98 underlying carbapenem non-susceptibility in *K. aerogenes* are thought to be  
99 carbapenemase independent and mediated by mutations affecting regulation of  
100 chromosomal AmpC  $\beta$ -lactamase expression and membrane permeability (2). The  
101 latter has been well documented in *K. aerogenes* with reports describing mutations  
102 impacting porin function/expression that can arise *in vivo* during antibiotherapy (6), be  
103 reversible (2), and present complex diagnostic and therapeutic management challenges  
104 (7).

105 Despite the role of *K. aerogenes* as an important opportunistic pathogen and its  
106 epidemic potential, the clinical relevance of intra-species genetic diversity and  
107 significance of specific sequence types (STs) remains unknown. In comparison, in  
108 genomically closely related *K. pneumoniae* and to some extent in *E. cloacae*, clonal  
109 complexes and sequence types (STs) associated with geographical distribution, multi-  
110 drug resistance, hospital outbreaks and disease syndromes have been defined (8, 9).  
111 Recently, a multi-locus sequence-typing (MLST) scheme has been developed for *K.*  
112 *aerogenes* (10) that can help explore the above-mentioned issues, however, its  
113 performance in evaluating and discriminating clinical/environmental isolates has not yet  
114 been reported.

115 We pursued this study to investigate an outbreak of CR-KA in a cardiothoracic  
116 intensive care unit (CICU) at our hospital, which persisted for 5 months despite  
117 aggressive infection control measures. The primary goals of our study included whole-

118 genome sequencing (WGS) based investigation of the clonal relationships among the  
119 CR-KA strains isolated from patients in our hospital and defining putative loci associated  
120 with carbapenem resistance and virulence. In addition, the recently developed publicly  
121 available *K. aerogenes* MLST scheme afforded us the opportunity to delineate the  
122 population structure of CR-KA strains isolated from patients at our hospital. Our initial  
123 findings led us to broadly investigate the origin and significance of specific *K. aerogenes*  
124 sequence types identified in our hospital CR-KA strains by performing comparative  
125 genomics using publicly available global *K. aerogenes* genomes.

126

## 127 **RESULTS**

### 128 **Epidemiological and genomic characterization of the CICU CR-KA cluster**

129 In July 2017, five CICU patients had CR-KA isolated from respiratory tract  
130 specimens (room occupancy and patient demographics detailed in Fig. 1 and Table S1).  
131 The first identified case (Patient A) had a past medical history significant for intravenous  
132 drug use and recurrent methicillin-resistant *Staphylococcus aureus* infections. Patient  
133 A's CICU course is described in Fig. S1. The temporal association of subsequent  
134 positive cultures in the CICU prompted an outbreak investigation. Between August to  
135 November 2017, despite extensive infection prevention interventions, 10 additional  
136 CICU patients had positive CR-KA cultures (Table S1). Of the 15 positive cultures from  
137 unique patients, 6 were clinical specimens (5 respiratory, 1 blood) and 9 were rectal  
138 surveillance cultures. Interventions included contact precautions for all patients on the  
139 unit, cohorting of staff, and weekly surveillance cultures of rectal swabs and tracheal  
140 aspirates. Environmental surveillance cultures during this period were negative. An

141 epidemiological investigation into the possible risk factors among the CICU patients  
142 developing CR-KA infections was non-contributory.

143 Antibiotic susceptibility testing (AST) of the CICU CR-KA strains revealed some  
144 differences in phenotype (Table 1) among the carbapenems and cephalosporins. Sixty  
145 percent of the CICU cluster strains were resistant to three carbapenems (ertapenem,  
146 imipenem and meropenem), while 93% showed phenotypic resistance to ertapenem.  
147 Susceptibility to cefepime also varied, with a subset of outbreak strains displaying  
148 phenotypic resistance (Table 1).

149 To address the possibility of an outbreak event, particularly in light of variable  
150 antibiotic susceptibilities, a WGS investigation was undertaken to identify phylogenetic  
151 relationships and transmission links. A total of 26 URM C. *aerogenes* isolates were  
152 sequenced using Illumina WGS. The primary strains investigated in this study were 15  
153 CR-KA isolates from patients admitted in the CICU, between June and Nov 2017 (Table  
154 S1). For context and comparison, an additional set of 9 CR-KA strains  
155 epidemiologically unlinked to the CICU-cluster strains (patient isolates between years  
156 2015-17), were included in the study (Table S2). Two clinical isolates were also  
157 included as controls, URM C 201 (intermediate susceptible to imipenem) and URM C 223  
158 (susceptible to all carbapenems tested). The AST profiles of the non-CICU CR-KA study  
159 strains are described in Table 1.

160 All of the 26 sequenced URM C *K. aerogenes* genomes showed high coverage  
161 (>88%) relative to the *K. aerogenes* reference KCTC 2190 strain (ATCC 13048<sup>T</sup>),  
162 Dataset 1. Single nucleotide polymorphisms (SNPs) were identified across the study  
163 genomes relative to the reference sequence (pair-wise SNP differences ranged from 1-

164 28,170, see Dataset 2). MLST assignment indicated that all of the CICU clinical and  
165 surveillance isolates belonged to ST4, and SNP-based analyses grouped them in a tight  
166 cluster separately and distantly from non-outbreak isolates (Fig. 2, Dataset 2). Within  
167 the CICU cluster, strains differed from URM C 205 (first case, patient A isolate) by less  
168 than 7 SNPs. In addition, these isolates bore an identical plasmid profile (based on  
169 replicon and plasmid typing) (Table S3). In contrast, all of the 2017 non-CICU isolates  
170 were significantly distant from the CICU outbreak isolates (>20,000 SNPs). The most  
171 closely related non-CICU CR-KA strain was URM C 201 (isolated in 2015). This strain  
172 was also ST4, with 433 SNPs in a pairwise comparison to URM C 205. (Fig. 2, Dataset  
173 2). These relationships, coupled with the epidemiological data, indicated that the 2017  
174 CICU CR-KA strains were of clonal origin.

175  
176 **Carbapenem resistance in the URM C CR-KA strains was driven by adaptive**  
177 **chromosomal gene alterations**

#### 178 **A. WGS based identification of acquired antibiotic resistance genes**

179 Despite phenotypic carbapenem resistance, the CICU CR-KA did not harbor  
180 genes for carbapenemases, extended-spectrum  $\beta$ -lactamases, or plasmid-borne AmpC  
181 cephalosporinases. A single non-outbreak CR-KA isolate (URM C 203) harbored a  
182 carbapenemase gene (*bla<sub>nmcA</sub>*). No horizontally acquired genes conferring resistance to  
183 non- $\beta$ -lactam antibiotics were identified among the study strains, consistent with their  
184 susceptibility profiles (Table 1).

#### 185 **B. Non-synonymous sequence alterations in key chromosomal loci**

186 **implicated in carbapenem resistance**



187 In the absence of genes encoding carbapenemases and ESBLs in the CR-KA  
188 outbreak strains, variations in other genetic loci associated with carbapenemase-  
189 independent resistance mechanisms were investigated (11-13). Focusing on the AmpC  
190 cephalosporinase and outer membrane porins, sequence variations in *ampD*, *ampG*,  
191 *ampR*, *omp35*, *omp36* and *ompR* genes in the study strains were assessed relative to  
192 the 'wild-type' allele in the carbapenem-susceptible reference type strain KCTC 2190  
193 (14). The sequences were also compared to alleles in URMC 223 (carbapenem  
194 susceptible) and URMC 201 (intermediate susceptibility). For the *omp* genes, the  
195 upstream DNA sequences were also assessed. The *ampG* and *ompR* genes were wild-  
196 type in all study strains. Variants were identified in all other loci and are described  
197 below:

198 ***ampD***. Mutations were identified in the *ampD* gene for each of the 24 CR-KA  
199 isolates in this study (Table 2), while the control strains URMC 223 and URMC 201 bore  
200 the 'wild-type' *ampD* allele. The outbreak strains harbored single missense SNPs  
201 (either 284G>T or 482G>A) in *ampD* resulting in Trp95Leu or Arg161His substitutions.  
202 Six non-outbreak CR-KA strains harbored independent non-synonymous single  
203 substitutions while 2 missense substitutions were identified in URMC 221. A single non-  
204 outbreak strain, URMC 202, harbored a nonsense mutation resulting in a truncated  
205 AmpD protein (Table 2). DNA sequence corresponding to *ampD* allele was absent in  
206 isolate URMC 203, (the only study strain to possess a carbapenemase-encoding gene  
207 *bla<sub>NMC-A</sub>*) due to a large deletion in the genomic region harboring *ampD* and the  
208 neighboring *ampE* gene.

209           The potential impact of Trp95Leu or Arg161His substitutions on AmpD activity in  
210 the outbreak strains was investigated by homology-based structural modeling of *K.*  
211 *aerogenes* AmpD using a high-resolution crystal structure of *Citrobacter freundii* AmpD  
212 (15), a close homolog (83.33% amino acid sequence identity). AmpD contains a  
213 hydrophobic surface to accommodate its GlcNAc-anh-MurNAc ligand, which is made up  
214 of tripeptide and glycan moieties. The tripeptide portion of GlcNAc-anh-MurNAc is  
215 coordinated through three salt bridges between carboxyl groups on the tripeptide and  
216 residues Arg71, Arg161 and Arg107, while the peptide backbone is oriented across the  
217 hydrophobic surface. Trp95 forms a planar surface at the end of the ligand-binding  
218 channel to position the diaminopimelate moiety at the distal end of the tripeptide.

219           Based on the *in silico K. aerogenes* AmpD model, the positively charged  
220 guanidinium group of Arg161 forms two strong electrostatic interactions with the  
221 carboxyl group of D-glutamine on the tripeptide portion of the ligand (Fig. 3). Mutation  
222 of this residue to histidine was predicted to weaken ligand binding, likely affecting the  
223 positioning of the ligand in the active site. In the Trp95Leu mutation, the hydrophobicity  
224 in the region is preserved, but the shorter length of the leucine side chain leaves a gap  
225 at the end of the binding channel likely affecting the positioning of the entire ligand (Fig.  
226 3). These observations lend support that the missense mutations observed in the CICU  
227 outbreak strains would alter ligand docking on AmpD likely reducing/inhibiting its  
228 activity. Four out of the seven CR-KA non-outbreak strains had substitutions within  
229 glycan and peptide interacting regions of AmpD (Table 2), suggesting that these  
230 alterations might also impact activity.

231           ***ampR***. All of the outbreak strains harbored the reference *ampR* allele. Several  
232 non-outbreak CR-KA strains harbored 2-5 substitutions that likely represent variant  
233 alleles as they were also observed in the control carbapenem-susceptible strain URMC  
234 223. A single non-outbreak CR-KA strain, URMC 210, bore a nonsense mutation in the  
235 *ampR* gene resulting in a premature stop codon (Trp117X), likely resulting in a non-  
236 functional truncated AmpR protein.

237           ***omp35* and *omp36***. Among the 15 outbreak CR-KA strains, three different  
238 *omp36* variants were identified relative to the wild-type allele (Table 3). An identical  
239 profile of missense SNPs in these strains and the control strain, URMC 201  
240 (intermediate carbapenem susceptibility) were observed relative to the reference  
241 genome allele. Seven outbreak strains had additional mutations that resulted in  
242 severely truncated proteins. Several non-outbreak CR-KA strains also harbored  
243 missense SNPS of unclear significance. Two strains URMC 202 and URMC 204  
244 harbored distinct frame-shift mutations yielding truncated Omp36 protein variants. A 42  
245 base-pair region of high variation (nucleotides 680-724), corresponding to 15/16 amino  
246 acid substitutions in loop L5 was observed in all the clinical isolates relative to the  
247 reference sequence (Table 3, Fig. S2). The hypervariable region results in a different  
248 charge profile in the region and has been previously reported in a *K. aerogenes* study  
249 describing imipenem resistant clinical isolates (harboring ESBL TEM-24) from patients  
250 in France (16). The predicted Omp36 protein in clinical strain URMC 221 and the  
251 carbapenem susceptible control strain (URMC 223) bore 87% identity relative to the  
252 reference genome Omp36 and were considered significantly distant variants (not  
253 included in the comparative analyses).

254 All but one of our 24 CR-KA strains had the wild-type allele of *omp35*. A single  
255 strain (URMC 202) bore a deletion in the N-terminal encoding region. The DNA  
256 sequence upstream of the *omp35* gene was investigated to identify mutations in the  
257 promoter sites of the strains, of which one (URMC 204) had a nucleotide difference of  
258 unclear significance at the -22 position.

259 **Virulome analysis identifies a large pathogenicity-associated integrative and**  
260 **conjugative element (ICE), ICE*Kp10* in the CICU outbreak CR-KA strains**

261 The prolonged nature of the clonal CR-KA outbreak in our CICU led us to search  
262 for putative virulence genes or pathogenicity loci, which could have promoted  
263 persistence and transmission. A cluster of chromosomally encoded genes encoding  
264 yersiniabactin (*ybt*) metallophore and colibactin (*clb*) genotoxin systems was identified  
265 in all of the outbreak strains (Fig. 4). These loci have been implicated in invasive  
266 infections of *K. pneumoniae* (17).

267 The *ybt* locus harbored putative genes involved in regulation as well as synthesis  
268 of the siderophore, corresponding transport associated proteins, and a receptor protein  
269 for the uptake of metal-bound siderophore. The *clb* locus included putative homologs  
270 encoding enzymes, transferases and transport proteins involved in production and  
271 secretion of the polyketide colibactin (Fig. 4, Dataset 3). Investigation of the genomic  
272 loci associated with the virulence factor gene cluster identified them to be present on a  
273 mobilizable integrative conjugative element (ICE) inserted in a tRNA-Asn site adjacent  
274 to a gene encoding the glycine cleavage system (Fig. 4). The ICE element bore a  
275 modular arrangement of gene clusters encoding mobile elements, P4 like integrase,  
276 type IV secretion system conjugation machinery and mobilization genes (Fig. 4, Dataset

277 3). The element was identified to be ICEKp10, using a recently described typing and  
278 interpretation scheme of *ybt* and *clb* sequences (17).

279 Among the URM C non-outbreak *K. aerogenes* strains, these putative virulence  
280 genes were identified in only 4/10 isolates, which were either ST4 or ST93. The control  
281 strain URM C 223 harbored the yersiniabactin locus exclusively. Detailed descriptions of  
282 these elements in the URM C *K. aerogenes* strains are described in Table S4.

### 283 **Comparative analyses of URM C CR-KA and publicly available *K. aerogenes*** 284 **genomes**

285 To gain insights into the emergence and epidemiology of the CICU outbreak  
286 clones and to place our hospital CR-KA strains in the broader context of global *K.*  
287 *aerogenes* strains, comparative phylogenomic analyses were performed using Harvest  
288 genomics suite (18). Publicly available *K. aerogenes* genome assemblies (n=110) were  
289 included in the analyses. These included 70 clinical and surveillance strains isolated  
290 from human specimens, 3 ‘environmental’ strains, and 36 strains of unknown origin  
291 (Dataset 4). Based on the newly described MLST scheme, ST4 and ST93 strains were  
292 found to be markedly overrepresented in the available genomes (51.8%, 57/110).

293 Excellent correlation was observed between Harvest generated tree topologies  
294 (Fig. 5) as well as pairwise SNP differences (Dataset 5) as compared to those  
295 generated by the CFSAN SNP pipeline, for the URM C CR-KA study strains. Based on  
296 Harvest analyses, the CICU outbreak strains clustered closely with each other and to  
297 other global ST4 genomes, as compared to the other URM C CR-KA strains (outbreak-  
298 unrelated), which were distantly dispersed throughout the phylogenomic distribution  
299 (Fig. 5). The MLST based sequence types of URM C CR-KA and the global *K.*

300 *aerogenes* genomes also correlated tightly with HARVEST generated core-genome  
301 based topologies (Fig. 5).

302 Six publicly available assembled genomes grouped closely with the CICU  
303 outbreak strain genomes (< 200 SNPs apart). These included ST4 strains, UCI 27, UCI  
304 28, UCI 45, which have been described in a carbapenem resistance surveillance study  
305 by Cerqueria et al. (19), and GN04794, GN05662 and GN02525; strains derived from  
306 varied US patients' clinical specimens (blood, sputum, wound drainage) Fig. 5, Dataset  
307 4). The above-mentioned strains had fewer SNP differences in relation to the CICU  
308 outbreak strains as compared to URM 201, the closest and only non-outbreak ST4  
309 strain isolated in our hospital (Fig. 5, Dataset 5).

310 Carbapenemase encoding genes were identified in a total 13/111 global *K.*  
311 *aerogenes* genome assemblies (11.8%) (Fig. 5). These included genes encoding KPC-  
312 2 (n=7), KPC-3 (n=1), OXA-48 (n=4) and NDM-6 (n=1). The chromosomal serine  
313 carbapenemase, *bla*<sub>NMC-A</sub>, was solely present in URM 203, a CR-KA strain isolated  
314 from a patient in our hospital in 2015. Among the thirty ST4 genomes, 4 strains (13%)  
315 harbored genes encoding carbapenemases (4/4, KPC-2), and these were clinical  
316 strains isolated from non-USA patients. The relative contribution of carbapenemase  
317 mediated versus non-carbapenemase mediated mechanisms of resistance to  
318 carbapenems in the global *K. aerogenes* could not be assessed due to the absence of  
319 antibiotic susceptibility metadata for most strains.

320 A characteristic genomic feature of the URM CICU outbreak strains and a  
321 subset of non-outbreak associated strains was the presence of the yersiniabactin  
322 siderophore and colibactin systems. Using Kleborate (17), we investigated the

323 distribution and organization of these systems in the global *K. aerogenes* genomes to  
324 identify associations, if any, with specific ST types and geographical regions (Fig. 5,  
325 Datasets 6). The prevalence of yersiniabactin and colibactin encoding systems in the  
326 global *K. aerogenes* genomes was found to be 53.64% (59/110) and 52.72% (58/111)  
327 respectively. A 100 % association was found between the presence of colibactin in the  
328 genomes and concurrent presence of yersiniabactin. Higher prevalence of the virulence  
329 cluster was observed in ST4 and ST93 types; 85% (12/14) and 95% (42/44)  
330 respectively, although these two ST types were also the most abundantly represented in  
331 the available set of genomes. The other ST types were less well represented in the  
332 study set ( $n < 3$ ), so the prevalence of these systems in them could not be accurately  
333 established. Interestingly, the strains exclusively designated 'environmental' isolates  
334 (B3, FGI35, and B) did not harbor genes encoding the above-mentioned virulence  
335 systems (Fig. 5, Dataset 6). These trends correlated with analyses of our 26 hospital  
336 strains, where 75% of the ST 93 strains (3/4) were positive for yersiniabactin and  
337 colibactin systems, while none of the strains with novel/unassigned ST types harbored  
338 genes encoding the same (0%, 5/5).

339

## 340 **DISCUSSION**

341 Whole genome sequencing presents a powerful resource that can be deployed  
342 for prospective and comprehensive outbreak investigations offering tremendous  
343 resolution in tracking transmission events and delineating genomic determinants  
344 associated with drug resistance and virulence (20). This WGS study was initiated in  
345 order to establish the molecular epidemiology of CR-KA strains isolated from patients in

346 our hospital. Beyond the outbreak investigation, whole genome data enabled us to  
347 address additional fundamental questions associated with carbapenem resistance,  
348 virulence attributes and population structure of *K. aerogenes* that are poorly understood.

349         Fifteen patients were associated with the CICU outbreak event in the period  
350 between July-November 2017. Based on the differences in AST patterns in a subset of  
351 study strains, it was initially questioned whether the strains were clonal. WGS  
352 investigations demonstrated that the 15 CICU CR-KA isolates differed from each other  
353 by less than 7 SNPs and grouped distantly from the other hospital CR-KA isolates,  
354 which were used as a baseline for context and comparison (Fig. 2). Based on these  
355 findings, the CICU CR-KA strains were concluded to be part of a single clonal cluster  
356 indicating protracted intra-ward transmission. Environmental sampling within the CICU  
357 remained negative and a common source of the outbreak or contributory risk factors  
358 could not be identified. After the last positive patient surveillance culture (Nov 2017), no  
359 CR-KA strains were isolated in a 2-month period of continued surveillance and the  
360 outbreak was deemed to have subsided. Phylogenomic analysis (albeit limited) of the  
361 non-CICU CR-KA isolates did not identify specific dominant clones circulating in the  
362 hospital (Fig. 2, Dataset 2).

363         Infections due to carbapenem-resistant organisms present complex diagnostic  
364 and therapeutic management challenges and a better understanding of how adaptive or  
365 acquired resistance emerges in the healthcare environment is needed (21). In clinical  
366 CR-KA strains, carbapenem resistance has been associated with carbapenemase  
367 production or adaptive mutations following antibiotic exposure (2). Among our 24 study  
368 CR-KA isolates, a single non-CICU strain harbored a carbapenemase-encoding gene,



369 *bla*<sub>NMC-A</sub>. NmcA has been reported in *E. cloacae* (22), but to our knowledge this is the  
370 first report of this carbapenemase being identified in *K. aerogenes*. All but one of the 24  
371 CR-KA strains were found to harbor mutations in genes involved in the synthesis or  
372 regulation of the inducible AmpC cephalosporinase (*ampD*, *ampR*) and outer membrane  
373 porins (*omp 35*, *omp36*). A majority of mutations were found to be within the open-  
374 reading frames of *ampD* and *omp36* (catalogued in Tables 2 and 3).

375         There are limited reports regarding the role of AmpD in adaptive carbapenem  
376 resistance in *K. aerogenes* strains (23, 24), although the role of AmpD in AmpC  
377 expression in *E. cloacae* has been well established (25). *In silico* modeling of *K.*  
378 *aerogenes* AmpD using the *C. freundii* AmpD crystal structure (15) predicted that  
379 Arg161His and Trp95Leu substitutions due to SNPs in the outbreak strains would likely  
380 impact enzymatic activity (Fig. 3). Other *ampD* mutations in several non-CICU CR-KA  
381 isolates were found to result in substitutions that could affect substrate-enzyme  
382 interactions (Table 2).

383         Mutations in *omp36* have been described in clinical CR-KA strains and functional  
384 studies investigating their impact have been reported (6, 26). A diverse array of  
385 mutations was identified in the *omp36* gene among the CR-KA study strains, including  
386 non-synonymous mutations resulting in frame-shifts or premature stop codons resulting  
387 in truncated and likely non-functional Omp36 variants (Table 3). Additional SNPs  
388 relative to the carbapenem-susceptible reference genome that resulted in substitutions  
389 of unknown significance in predicted  $\beta$ -sheets and extracellular loop regions (Table 3,  
390 Fig. S2).

391 Even within the CICU CR-KA clonal cluster, heterogeneity was identified in *ampD*  
392 and *omp36* genes (Table 2, Table 3). These genetic loci likely represent mutational  
393 hotspots associated with adaptive carbapenem resistance in *K. aerogenes*. It is likely  
394 that the CICU CR-KA cluster represents a population of clonal origin, albeit with micro-  
395 heterogeneity in the above regions. The testing and archiving of single isolated  
396 carbapenem resistant colonies instead of multiples during individual patient specimen  
397 workup likely represents a limitation that did not allow us to capture the full complement  
398 of CR-KA strain microdiversity associated with individual patients during the outbreak  
399 event.

400 The detailed significance of the alleles and mutations described above in  
401 development of carbapenem resistance in *K. aerogenes* needs to be verified by  
402 additional genetic (allelic exchange and complementation) and biochemical approaches.  
403 Moreover, complex regulatory networks including transcriptional activators, sensor  
404 kinases and two-component systems have been implicated in adaptive drug resistance  
405 in *Enterobacteriaceae spp.* (13), and their roles in contributing towards carbapenem  
406 resistance in our study strains cannot be ruled out.

407 Despite their lack of horizontally acquired drug resistance elements, the outbreak  
408 strains in this study managed to persist for several months in the face of an active  
409 infection prevention effort prompting us to assess their virulence determinants. The  
410 outbreak strains and a subset of non-outbreak CR-KA strains harbored an ICE  
411 encoding the metallophore yersiniabactin (Ybt) and genotoxin colibactin (Cib)  
412 systems (Fig. 4, Table S4). A Ybt encoding pathogenicity island has been described in  
413 association with a prolonged nation-wide outbreak in the Netherlands involving multiple

414 hospitals and >100 patients due to a multi-drug resistant *Enterobacter hormaechei*  
415 clone (27). A recent study by Lam *et al.* described the prevalence of *ybt* to be  
416 particularly high (>80%) in certain hypervirulent *K. pneumoniae* clonal-groups (CG23)  
417 (17). The study also reported a significant association of Ybt with an increased risk of  
418 invasive infections (bacteremia, liver abscesses etc.). Ybt was first described in  
419 pathogenic *Yersinia spp.*, encoded by a chromosomal gene cluster termed the High  
420 Pathogenicity Island (HPI), with a critical role in iron scavenging during infection (28).  
421 Subsequent studies reported acquisition of the HPI in other clinical *Enterobacteriaceae*  
422 strains (17, 29) and additional functions ascribed to Ybt include evasion of host  
423 lipocalin-2 (30) and sequestration/import of heavy metals (31). The polyketide colibactin  
424 is frequently associated with yersiniabactin and has been shown to induce  
425 chromosomal instability and DNA damage in eukaryotic cells (32). Our findings present  
426 new avenues for research investigating the role of ICE elements encoding Ybt and Clb  
427 in the virulence of clinical *K. aerogenes* strains. While horizontal transmission of  
428 carbapenemases via mobile elements is increasingly recognized as a major public  
429 health issue (33), the transmission of mobilizable virulence factors present an  
430 underappreciated threat in the healthcare environment that warrants more surveillance.

431         In order to set our hospital strains (outbreak and non-outbreak) into a broader  
432 context, core-genome comparisons and MLST were used to examine the population  
433 structure of our strains relative to global *K. aerogenes* strains pulled from public  
434 databases (Fig. 5, Datasets 5, 6). This analysis is the first evaluation of the nascent *K.*  
435 *aerogenes* MLST scheme in discriminating clinical *K. aerogenes* isolates. The scheme  
436 was found to be robust with distribution of STs correlating closely with topologies based

437 on *K. aerogenes* strains core-genomes. Our preliminary analyses suggest that ST4 and  
438 ST93 might be dominant global clones associated with *K. aerogenes* infections.  
439 Outbreak CR-KA strains clustered closest to other clinical US ST4 strains, suggesting a  
440 clonal expansion of this ST (Fig. 5). It is noteworthy that the ST4 group also included  
441 carbapenemase-producing *K. aerogenes* isolates from international sites. These  
442 included CR-KA strains associated with drug-resistant intra-abdominal and urinary tract  
443 infections in patient samples from Brazil, Canada, Colombia and China that had been  
444 sequenced as a part of large surveillance study, SMART (Study for Monitoring  
445 Antimicrobial Resistance Trends) (34). ST93 was the most prevalent sequence type in  
446 the global *K. aerogenes* assembled genomes (43/110, 39%), with a wide geographical  
447 distribution including the US (Fig. 5). Four of the eleven non-CICU CR-KA strains from  
448 our hospital belonged to this group. Two closely related ST93 isolates, *K. aerogenes*  
449 1509E and G7, have been described as representatives of clonal strains associated  
450 with multiple multi-drug resistant *K. aerogenes* outbreaks in France (35, 36).  
451 Incidentally, global ST4 and ST93 isolates also had a higher prevalence of HPI  
452 encoding *ybt* and *clb* (85% and 95% respectively). The success of these potentially  
453 “high-risk” clones needs to be examined more closely by undertaking large-scale  
454 studies with strains from diverse global sites and patient populations. These studies will  
455 help examine niche adaptation, emergence of antibiotic resistance and evolution of  
456 pathogenicity leading to a better understanding of *K. aerogenes*.

457 In summary, genomic approaches for surveillance and outbreak investigations  
458 are emerging as critical functions for infection prevention and diagnostic microbiology  
459 laboratories. Apart from evaluating the effectiveness of infection measures and

460 dimension of transmission events, WGS applied across sets of isolates is a powerful  
461 tool for assessing virulence factors and identifying clinically relevant and emerging  
462 sequence types.

463

## 464 **MATERIALS AND METHODS**

### 465 **Setting, study design, *K. aerogenes* strains and metadata.**

466 The University of Rochester Medical Center (URMC) is an 830-bed tertiary-care medical  
467 center, with a 14-bed cardiothoracic intensive care unit, serving the Greater Rochester  
468 Area, New York. Following approval by the University of Rochester Institutional Review  
469 Board (RSRB00068143), a total of 26 *K. aerogenes* strains isolated from patients at  
470 URMC in the course of regular clinical care and/or surveillance efforts were selected for  
471 the study. Each isolate corresponded to a single first CR-KA strain isolated during the  
472 course of hospitalization. For context and comparison, an additional set of *K.*  
473 *aerogenes* strains epidemiologically unlinked to the CICU outbreak was included in the  
474 study. Ward occupancy and pertinent clinical and epidemiological information were  
475 obtained through review of patient medical records and the laboratory information  
476 system, and are described in Tables S1 and S2.

477

### 478 **Antibiotic susceptibility testing (AST) of the study *K. aerogenes* strains**

479 AST of the study strains was performed as part of routine diagnostics using the  
480 VITEK®2 (BioMérieux, France) system and/or Kirby Bauer disk-diffusion methods. AST  
481 interpretations were based on interpretive criteria defined by the Clinical and Laboratory  
482 Standards Institute (M100 document, 27<sup>th</sup> Edition).

## 483 **Sequencing library preparation and raw data acquisition**

484 The isolates were cultured on standard laboratory media from archived frozen stocks,  
485 examined for purity, and re-identified by Vitek MALDI-TOF MS (BioMérieux, France).  
486 Single colony genomic DNA extractions were performed using MagNA Pure Compact  
487 instrument (Roche Diagnostics, Indianapolis, IN); the DNA quality was analyzed using  
488 QuantiFluor dsDNA system (Promega). Nextera XT kit (Illumina, San Diego, CA) was  
489 used for preparing dual-indexed WGS libraries. For QC dsDNA quality of individual  
490 samples was analyzed using the 4200 TapeStation system (Agilent). Following library  
491 cleanup, individual libraries were pooled at equimolar ratios and denatured; DNA  
492 concentration was determined using Qubit ssDNA kit (Thermo fisher Scientific). The  
493 libraries were combined with 20pM PhiX control and sequenced on the Illumina Miseq™  
494 benchtop sequencer (Illumina, San Diego, CA) at the URM C Genomic Core Facilities,  
495 using V3 kit and 2X300 bp paired-end protocol.

496

## 497 **Genomic analyses**

498 Analyses were performed using an in-house bioinformatics pipeline 'URMC Bacterial  
499 Genomic Analysis Pipeline' (v2.0.6), run on a high-performance computer cluster at the  
500 Center for Integrated Research Computing at University of Rochester. **A) Quality**  
501 **control:** For each sample, the read quality scores across all bases were assessed  
502 using FastQC v0.11.5 (37) and low quality reads were trimmed using Trimmomatic  
503 v0.36 (38). Genomic coverage of the sequencing reads relative to the reference *K.*  
504 *aerogenes* KCTC 2190 genome (ATCC 13048<sup>T</sup>; Refseq accession  
505 number: NC\_015663.1) were determined using Bowtie 2 v2.2.9 (39). Across the study

506 isolates, alignments showed average genomic coverage of 90.84% (minimum 89%) with  
507 an average depth of coverage: 100X (excluding regions below 12X). Quality metrics  
508 are detailed in Dataset 1. **B) Core-genome SNP calling workflow:** A read mapping  
509 approach was used to assess SNPs in the genomes of the study CR-KA strains relative  
510 to the reference genome *K. aerogenes* KCTC 2190. Mapping, variant calling and  
511 phylogenetic analysis were performed by locally installed CFSAN SNP Pipeline v1.0.0  
512 (40), an analysis workflow developed by the U.S Food and Drug Administration (FDA).  
513 CFSAN pipeline employs a 2-phase variant calling workflow and the ‘optimized’ version  
514 of the pipeline with criteria as applied by Saltykova et al (higher stringency in allele  
515 frequency thresholds and coverage) (41) was applied. In the first phase, variants were  
516 called based on *mpileup function* of SAMTools and *mpileup2snp tool* from VarScan  
517 (minimum average base quality=20, minimum read depth of coverage at site=12,  
518 minimum allele frequency=90%). Densely clustered SNPs that could arise due to  
519 recombination were excluded ( $\geq 3$  SNPs in a 50 bp window). High-confidence SNP  
520 variants meeting the criteria were composed to a list. In the 2<sup>nd</sup> phase, nucleotide sites  
521 at the listed positions were determined for all sites (minimum allele frequency threshold  
522 for SNP filtering=90%). SNPs located in mobile elements as annotated by RAST were  
523 excluded. The final nucleotide sites post filtering corresponding to the listed positions  
524 were used to build a SNP matrix. A multi FASTA file with concatenated SNP matrix  
525 entries were used for inferring phylogeny by FastTree (42), which were visualized using  
526 ITOL (43). **C) Sequence assembly, scaffolding, annotation and analyses:** De novo  
527 genome assemblies (average  $N_{50}$ : 344943 across all isolates) were generated by  
528 SPAdes genome Assembler v3.11.1 (44), and the assembly quality was assessed by

529 QUAST v4.5 (45). Ordering and orientation of contigs was performed using Medusa .  
530 Draft genomes were annotated with RAST (46) and Prokka (47). MLST on the *K.*  
531 *aerogenes* genomes was performed using a newly developed publicly available scheme  
532 (10). Alleles and genetic markers corresponding to acquired antibiotic resistance,  
533 virulence and plasmid replicons were identified using PlasmidFinder (48), ResFinder  
534 (49), and Virulence Factor Database (50). Typing of genetic loci associated with  
535 mobilizable yersiniabactin siderophore and genotoxin colibactin systems was performed  
536 using Kleborate (17), and the loci were visualized with MacVector software (MacVector,  
537 Cary, NC). Sequence variations in chromosomal genes associated with carbapenem  
538 resistance in the study strains were assessed relative to alleles in control strains  
539 (URMC 201, URMC 223) and ‘wild-type’ alleles in carbapenem susceptible (14)  
540 reference genome KCTC 2190 [Genbank ID-*ampD*: 10792472 (EAE\_11350), *ampG*:  
541 10792757 (EAE\_12735), *ampR*: 10792632 (EAE\_12115), *omp35*: 10793271  
542 (EAE\_15245), *omp36*: 10795060 (EAE\_24205) and *ompR*: 10791222 (EAE\_05245)].  
543 Multiple sequence alignments of gene alleles and corresponding proteins was  
544 performed using Vector NTI software (Invitrogen, Carlsbad, CA) and the alignments  
545 were manually inspected to identify substitutions that would likely impact function. **D)**  
546 **Comparative genomics of publicly available global *K. aerogenes* assembled**  
547 **genomes with URMC CR-KA assemblies:** Using a custom shell script, publicly  
548 available *K. aerogenes* genomes available as of July 2018 in the NCBI genome  
549 database were downloaded from the NCBI FTP site. Harvest genomics suite was used  
550 to perform intraspecific core-genome alignments as described before (18); phylogenies  
551 were visualized using ITOL (43). **E) Accession number(s):** WGS and metadata



552 corresponding to the study URM C. *aerogenes* isolates were deposited at NCBI under  
553 BioProject accession number PRJNA504784. Accession numbers for individual isolates  
554 are listed in Table S1.

555

### 556 ***In silico* protein analyses**

557 For homology modeling, SWISS-MODEL (51) was used to thread *K. aerogenes*  
558 AmpD (acc WP\_015704411.1, aa1-187) through the structure of *C. freundii* AmpD (15)  
559 (PDB 2y2c, aa1-187). The overall quaternary structure of *K. aerogenes* AmpD was  
560 predicted with high precision (95% confidence, 99% coverage). Comparative analyses  
561 and imaging of protein structures were performed with PyMOL (52). JalView was used  
562 to create alignments (53).

563

### 564 **ACKNOWLEDGEMENTS**

565 We are grateful to the URM C Clinical Microbiology Laboratories and Infection  
566 Prevention staff in specimen processing, data collection and epidemiological  
567 investigations. We wish to acknowledge the URM C Genomics Research Center for  
568 support with WGS. We also thank Steve Gill (URMC, Genomics Research Center) for  
569 reviewing the manuscript draft. Internal funding from University of Rochester  
570 Department of Pathology and Laboratory Medicine supported this study. We report no  
571 conflicts of interest relevant to this article.

572

573

574

575

576 **REFERENCES**

577

- 578 1. **Sanders WE, Jr., Sanders CC.** 1997. *Enterobacter spp.*: pathogens poised to  
579 flourish at the turn of the century. Clin Microbiol Rev **10**:220-241.
- 580 2. **Davin-Regli A, Pages JM.** 2015. *Enterobacter aerogenes* and *Enterobacter*  
581 *cloacae*; versatile bacterial pathogens confronting antibiotic treatment. Front  
582 Microbiol **6**:392.
- 583 3. **Guh AY, Bulens SN, Mu Y, Jacob JT, Reno J, Scott J, Wilson LE, Vaeth E,**  
584 **Lynfield R, Shaw KM, Vagnone PM, Bamberg WM, Janelle SJ, Dumyati G,**  
585 **Concannon C, Beldavs Z, Cunningham M, Cassidy PM, Phipps EC, Kenslow**  
586 **N, Travis T, Lonsway D, Rasheed JK, Limbago BM, Kallen AJ.** 2015.  
587 Epidemiology of Carbapenem-Resistant *Enterobacteriaceae* in 7 US  
588 Communities, 2012-2013. JAMA **314**:1479-1487.
- 589 4. **Lee HJ, Choi JK, Cho SY, Kim SH, Park SH, Choi SM, Lee DG, Choi JH, Yoo**  
590 **JH.** 2016. Carbapenem-resistant *Enterobacteriaceae*: Prevalence and Risk  
591 Factors in a Single Community-Based Hospital in Korea. Infect Chemother  
592 **48**:166-173.
- 593 5. **Robert J, Pantel A, Merens A, Lavigne JP, Nicolas-Chanoine MH, Group**  
594 **ONsCRS.** 2014. Incidence rates of carbapenemase-producing  
595 *Enterobacteriaceae* clinical isolates in France: a prospective nationwide study in  
596 2011-12. J Antimicrob Chemother **69**:2706-2712.
- 597 6. **Philippe N, Maignre L, Santini S, Pinet E, Claverie JM, Davin-Regli AV, Pages**  
598 **JM, Masi M.** 2015. In Vivo Evolution of Bacterial Resistance in Two Cases of

- 599 *Enterobacter aerogenes* Infections during Treatment with Imipenem. PLOS One  
600 **10:e0138828.**
- 601 7. **Boucher HW, Talbot GH, Bradley JS, Edwards JE, Gilbert D, Rice LB,**  
602 **Scheld M, Spellberg B, Bartlett J.** 2009. Bad bugs, no drugs: no ESKAPE! An  
603 update from the Infectious Diseases Society of America. Clin Infect Dis **48**:1-12.
- 604 8. **Wyres KL, Holt KE.** 2016. *Klebsiella pneumoniae* Population Genomics and  
605 Antimicrobial-Resistant Clones. Trends Microbiol **24**:944-956.
- 606 9. **Gomez-Simmonds A, Annavajhala MK, Wang Z, Macesic N, Hu Y, Giddins**  
607 **MJ, O'Malley A, Toussaint NC, Whittier S, Torres VJ, Uhlemann AC.** 2018.  
608 Genomic and Geographic Context for the Evolution of High-Risk Carbapenem-  
609 Resistant *Enterobacter cloacae* Complex Clones ST171 and ST78. MBio **9.**
- 610 10. <https://pubmlst.org/kaerogenes/>
- 611 11. **Jacoby GA.** 2009. AmpC beta-lactamases. Clin Microbiol Rev **22**:161-182.
- 612 12. **Dupont H, Choinier P, Roche D, Adiba S, Sookdeb M, Branger C, Denamur**  
613 **E, Mammeri H.** 2017. Structural Alteration of OmpR as a Source of Ertapenem  
614 Resistance in a CTX-M-15-Producing *Escherichia coli* O25B:H4 Sequence Type  
615 131 Clinical Isolate. Antimicrob Agents Chemother **61.**
- 616 13. **Pages JM, James CE, Winterhalter M.** 2008. The porin and the permeating  
617 antibiotic: a selective diffusion barrier in Gram-negative bacteria. Nat Rev  
618 Microbiol **6**:893-903.
- 619 14. **Lavigne JP, Sotto A, Nicolas-Chanoine MH, Bouziges N, Bourg G, Davin-**  
620 **Regli A, Pages JM.** 2012. Membrane permeability, a pivotal function involved in

- 621 antibiotic resistance and virulence in *Enterobacter aerogenes* clinical isolates.  
622 Clin Microbiol Infect **18**:539-545.
- 623 15. **Carrasco-Lopez C, Rojas-Altuve A, Zhang W, Heseck D, Lee M, Barbe S,**  
624 **Andre I, Ferrer P, Silva-Martin N, Castro GR, Martinez-Ripoll M, Mobashery**  
625 **S, Hermoso JA.** 2011. Crystal structures of bacterial peptidoglycan amidase  
626 AmpD and an unprecedented activation mechanism. J Biol Chem **286**:31714-  
627 31722.
- 628 16. **Thiolas A, Bornet C, Davin-Regli A, Pages JM, Bollet C.** 2004. Resistance to  
629 imipenem, cefepime, and cefpirome associated with mutation in Omp36  
630 osmoporin of *Enterobacter aerogenes*. Biochem Biophys Res Commun **317**:851-  
631 856.
- 632 17. **Lam MMC, Wick RR, Wyres KL, Gorrie CL, Judd LM, Jenney AWJ, Brisse S,**  
633 **Holt KE.** 2018. Genetic diversity, mobilisation and spread of the yersiniabactin-  
634 encoding mobile element ICEKp in *Klebsiella pneumoniae* populations. Microb  
635 Genom.
- 636 18. **Treangen TJ, Ondov BD, Koren S, Phillippy AM.** 2014. The Harvest suite for  
637 rapid core-genome alignment and visualization of thousands of intraspecific  
638 microbial genomes. Genome Biol **15**:524.
- 639 19. **Cerqueira GC, Earl AM, Ernst CM, Grad YH, Dekker JP, Feldgarden M,**  
640 **Chapman SB, Reis-Cunha JL, Shea TP, Young S, Zeng Q, Delaney ML, Kim**  
641 **D, Peterson EM, O'Brien TF, Ferraro MJ, Hooper DC, Huang SS, Kirby JE,**  
642 **Onderdonk AB, Birren BW, Hung DT, Cosimi LA, Wortman JR, Murphy CI,**  
643 **Hanage WP.** 2017. Multi-institute analysis of carbapenem resistance reveals

- 644 remarkable diversity, unexplained mechanisms, and limited clonal outbreaks.  
645 Proc Natl Acad Sci U S A **114**:1135-1140.
- 646 20. **Quainoo S, Coolen JPM, van Hijum S, Huynen MA, Melchers WJG, van**  
647 **Schaik W, Wertheim HFL.** 2017. Whole-Genome Sequencing of Bacterial  
648 Pathogens: the Future of Nosocomial Outbreak Analysis. Clin Microbiol Rev  
649 **30**:1015-1063.
- 650 21. **Goodman KE, Simner PJ, Tamma PD, Milstone AM.** 2016. Infection control  
651 implications of heterogeneous resistance mechanisms in carbapenem-resistant  
652 *Enterobacteriaceae* (CRE). Expert Rev Anti Infect Ther **14**:95-108.
- 653 22. **Pottumarthy S, Moland ES, Juretschko S, Swanzy SR, Thomson KS,**  
654 **Fritsche TR.** 2003. Nmca carbapenem-hydrolyzing enzyme in *Enterobacter*  
655 *cloacae* in North America. Emerging infectious diseases **9**:999-1002.
- 656 23. **Tzouvelekis LS, Tzelepi E, Kaufmann ME, Mentis AF.** 1994. Consecutive  
657 mutations leading to the emergence in vivo of imipenem resistance in a clinical  
658 strain of *Enterobacter aerogenes*. J Med Microbiol **40**:403-407.
- 659 24. **Babouee Flury B, Ellington MJ, Hopkins KL, Turton JF, Doumith M,**  
660 **Woodford N.** 2016. The differential importance of mutations within AmpD in  
661 cephalosporin resistance of *Enterobacter aerogenes* and *Enterobacter cloacae*.  
662 Int J Antimicrob Agents **48**:555-558.
- 663 25. **Babouee Flury B, Ellington MJ, Hopkins KL, Turton JF, Doumith M, Loy R,**  
664 **Staves P, Hinic V, Frei R, Woodford N.** 2016. Association of Novel  
665 Nonsynonymous Single Nucleotide Polymorphisms in *ampD* with Cephalosporin  
666 Resistance and Phylogenetic Variations in *ampC*, *ampR*, *ompF*, and *ompC* in

- 667 *Enterobacter cloacae* Isolates That Are Highly Resistant to Carbapenems.  
668 Antimicrob Agents Chemother **60**:2383-2390.
- 669 26. **De Gheldre Y, Maes N, Rost F, De Ryck R, Clevenbergh P, Vincent JL,**  
670 **Struelens MJ.** 1997. Molecular epidemiology of an outbreak of multidrug-  
671 resistant *Enterobacter aerogenes* infections and in vivo emergence of imipenem  
672 resistance. J Clin Microbiol **35**:152-160.
- 673 27. **Paauw A, Caspers MP, Leverstein-van Hall MA, Schuren FH, Montijn RC,**  
674 **Verhoef J, Fluit AC.** 2009. Identification of resistance and virulence factors in an  
675 epidemic *Enterobacter hormaechei* outbreak strain. Microbiology **155**:1478-1488.
- 676 28. **Heesemann J, Hantke K, Vocke T, Saken E, Rakin A, Stojiljkovic I, Berner R.**  
677 1993. Virulence of *Yersinia enterocolitica* is closely associated with siderophore  
678 production, expression of an iron-repressible outer membrane polypeptide of  
679 65,000 Da and pesticin sensitivity. Molecular Microbiology **8**:397-408.
- 680 29. **Putze J, Hennequin C, Nougayrede JP, Zhang W, Homburg S, Karch H,**  
681 **Bringer MA, Fayolle C, Carniel E, Rabsch W, Oelschlaeger TA, Oswald E,**  
682 **Forestier C, Hacker J, Dobrindt U.** 2009. Genetic structure and distribution of  
683 the colibactin genomic island among members of the family *Enterobacteriaceae*.  
684 Infect Immun **77**:4696-4703.
- 685 30. **Bachman MA, Lenio S, Schmidt L, Oyler JE, Weiser JN.** 2012. Interaction of  
686 lipocalin 2, transferrin, and siderophores determines the replicative niche of  
687 *Klebsiella pneumoniae* during pneumonia. MBio **3**.

- 688 31. **Robinson AE, Lowe JE, Koh EI, Henderson JP.** 2018. Uropathogenic  
689 enterobacteria use the yersiniabactin metallophore system to acquire nickel. *J*  
690 *Biol Chem.*
- 691 32. **Fais T, Delmas J, Barnich N, Bonnet R, Dalmaso G.** 2018. Colibactin: More  
692 Than a New Bacterial Toxin. *Toxins (Basel)* **10**.
- 693 33. **Gupta N, Limbago BM, Patel JB, Kallen AJ.** 2011. Carbapenem-resistant  
694 *Enterobacteriaceae*: epidemiology and prevention. *Clin Infect Dis* **53**:60-67.
- 695 34. **Morrissey I, Hackel M, Badal R, Bouchillon S, Hawser S, Biedenbach D.**  
696 2013. A Review of Ten Years of the Study for Monitoring Antimicrobial  
697 Resistance Trends (SMART) from 2002 to 2011. *Pharmaceuticals (Basel)*  
698 **6**:1335-1346.
- 699 35. **Diene SM, Merhej V, Henry M, El Filali A, Roux V, Robert C, Azza S, Gavory**  
700 **F, Barbe V, La Scola B, Raoult D, Rolain JM.** 2013. The rhizome of the  
701 multidrug-resistant *Enterobacter aerogenes* genome reveals how new "killer  
702 bugs" are created because of a sympatric lifestyle. *Mol Biol Evol* **30**:369-383.
- 703 36. **Thiolas A, Bollet C, La Scola B, Raoult D, Pages JM.** 2005. Successive  
704 emergence of *Enterobacter aerogenes* strains resistant to imipenem and colistin  
705 in a patient. *Antimicrob Agents Chemother* **49**:1354-1358.
- 706 37. <http://www.bioinformatics.babraham.ac.uk/projects/fastqc/> .
- 707 38. **Bolger AM, Lohse M, Usadel B.** 2014. Trimmomatic: a flexible trimmer for  
708 Illumina sequence data. *Bioinformatics* **30**:2114-2120.
- 709 39. **Langmead B, Salzberg SL.** 2012. Fast gapped-read alignment with Bowtie 2.  
710 *Nat Methods* **9**:357-359.

- 711 40. **Davis S, Pettengill JB, Luo Y, Payne J, Shpuntoff A, Rand H, Strain E.** 2015.  
712 CFSAN SNP Pipeline: an automated method for constructing SNP matrices from  
713 next-generation sequence data. *PeerJ Computer Science* **1**:e20.
- 714 41. **Saltykova A, Wuyts V, Mattheus W, Bertrand S, Roosens NHC, Marchal K,**  
715 **De Keersmaecker SCJ.** 2018. Comparison of SNP-based subtyping workflows  
716 for bacterial isolates using WGS data, applied to *Salmonella enterica* serotype  
717 Typhimurium and serotype 1,4,[5],12:i. *PLOS One* **13**:e0192504.
- 718 42. **Price MN, Dehal PS, Arkin AP.** 2010. FastTree 2-approximately maximum-  
719 likelihood trees for large alignments. *PLOS One* **5**:e9490.
- 720 43. **Letunic I, Bork P.** 2016. Interactive tree of life (iTOL) v3: an online tool for the  
721 display and annotation of phylogenetic and other trees. *Nucleic Acids Res*  
722 **44**:W242-245.
- 723 44. **Bankevich A, Nurk S, Antipov D, Gurevich AA, Dvorkin M, Kulikov AS,**  
724 **Lesin VM, Nikolenko SI, Pham S, Prjibelski AD, Pyshkin AV, Sirotkin AV,**  
725 **Vyahhi N, Tesler G, Alekseyev MA, Pevzner PA.** 2012. SPAdes: a new  
726 genome assembly algorithm and its applications to single-cell sequencing. *J*  
727 *Comput Biol* **19**:455-477.
- 728 45. **Gurevich A, Saveliev V, Vyahhi N, Tesler G.** 2013. QUAST: quality  
729 assessment tool for genome assemblies. *Bioinformatics* **29**:1072-1075.
- 730 46. **Aziz RK, Bartels D, Best AA, DeJongh M, Disz T, Edwards RA, Formsma K,**  
731 **Gerdes S, Glass EM, Kubal M, Meyer F, Olsen GJ, Olson R, Osterman AL,**  
732 **Overbeek RA, McNeil LK, Paarmann D, Paczian T, Parrello B, Pusch GD,**  
733 **Reich C, Stevens R, Vassieva O, Vonstein V, Wilke A, Zagnitko O.** 2008. The



- 734 RAST Server: rapid annotations using subsystems technology. BMC genomics  
735 **9:75.**
- 736 47. **Seemann T.** 2014. Prokka: rapid prokaryotic genome annotation. Bioinformatics  
737 **30:2068-2069.**
- 738 48. **Carattoli A, Zankari E, Garcia-Fernandez A, Voldby Larsen M, Lund O, Villa**  
739 **L, Moller Aarestrup F, Hasman H.** 2014. In silico detection and typing of  
740 plasmids using PlasmidFinder and plasmid multilocus sequence typing.  
741 Antimicrob Agents Chemother **58:3895-3903.**
- 742 49. **Zankari E, Hasman H, Cosentino S, Vestergaard M, Rasmussen S, Lund O,**  
743 **Aarestrup FM, Larsen MV.** 2012. Identification of acquired antimicrobial  
744 resistance genes. J Antimicrob Chemother **67:2640-2644.**
- 745 50. **Chen L, Zheng D, Liu B, Yang J, Jin Q.** 2016. VFDB 2016: hierarchical and  
746 refined dataset for big data analysis--10 years on. Nucleic Acids Res **44:D694-**  
747 **697.**
- 748 51. **Waterhouse A, Bertoni M, Bienert S, Studer G, Tauriello G, Gumienny R,**  
749 **Heer FT, de Beer TAP, Rempfer C, Bordoli L, Lepore R, Schwede T.** 2018.  
750 SWISS-MODEL: homology modelling of protein structures and complexes.  
751 Nucleic Acids Res **46:W296-W303.**
- 752 52. **Seeliger D, de Groot BL.** 2010. Ligand docking and binding site analysis with  
753 PyMOL and Autodock/Vina. J Comput Aided Mol Des **24:417-422.**
- 754 53. **Waterhouse AM, Procter JB, Martin DM, Clamp M, Barton GJ.** 2009. Jalview  
755 Version 2--a multiple sequence alignment editor and analysis workbench.  
756 Bioinformatics **25:1189-1191.**

## FIGURE LEGENDS

**Fig. 1. Patient occupancy and overlap in CICU ward during the *K. aerogenes* outbreak.** Black bars-first positive CR-KA clinical cultures, blue bars-first positive CR-KA surveillance cultures

**Fig. 2. Dendrogram showing pairwise SNP differences based phylogenetic relatedness of URMC *K. aerogenes* strains.** Whole genome sequence of *K. aerogenes* KCTC 2190 (ATCC 13048) was used for reference mapping. A total of 28,170 discriminatory high-quality SNPs in the core genomes obtained by the CFSAN SNP pipeline were used to plot the tree (excluding mobile elements and putative recombination sites). CICU outbreak strains: IDs highlighted in red, clinical isolates in bold, patient A isolate (1<sup>st</sup> case) with yellow background. Year strain isolated: orange-2015, yellow-2016, blue-2017. SNP differences relative to patient A shown. Scale bar indicates nucleotide substitutions per site.

**Fig. 3. Computational modeling of the impact of *ampD* mutations on AmpD in URMC outbreak CR-KA strains.** A) *K. aerogenes* AmpD modeled on *C. freundii* AmpD structure. Key residues interacting with glycan and peptide portions of ligand are shown. B, C) Surface models of *K. aerogenes* AmpD depicting the wild-type binding surface for the diaminopimelate moiety (W95, top) versus the binding surface of AmpD containing the W95L mutation (blue surfaces indicate amino acid positions from panel A; bottom, altered surface highlighted in red).

**Fig. 4. Yersiniabactin and colibactin encoding gene loci on integrative conjugative element ICEKp10 in the CICU outbreak CR-KA strains.** Blue arrows-integrase encoding genes, brown arrows-Zn<sup>2+</sup>/Mn<sup>2+</sup> modules grey arrows-genes encoding mobilization proteins, pink arrows: vir-T4SS system.

**Fig. 5. Harvest based phylogenomic comparisons of URM C *K. aerogenes* genomes with global *K. aerogenes* genomes.** Discriminatory SNPs based on core genome comparisons were used to plot the tree. URM C study *K. aerogenes* strains in purple (outbreak strains in bold, index patient strain highlighted yellow). Presence of genes encoding yersiniabactin siderophore system (green squares), colibactin synthesis cluster (blue triangles), and carbapenamases (red circles) in assembled genomes shown. Scale bar indicates nucleotide substitutions per site.

**Table 1. Phenotypic antibiotic susceptibility profiles of *K. aerogenes* strains in this study**

| Study Isolates                           |           | Amikacin | Gentamicin | Tobramycin | Ciprofloxacin | Moxifloxacin | Trimethoprim-Sulfa | Piperacillin-Tazobactam | Ceftriaxone | Cefepime | Ertapenem | Imipenem | Meropenem |
|------------------------------------------|-----------|----------|------------|------------|---------------|--------------|--------------------|-------------------------|-------------|----------|-----------|----------|-----------|
| 2017 URMIC CICU associated CR-KA strains | URMC 205* | S        | S          | S          | S             | S            | S                  | R                       | R           | S        | R         | R        | R         |
|                                          | URMC 206  | S        | S          | S          | S             | S            | S                  | R                       | R           | S        | R         | R        | R         |
|                                          | URMC 207  | S        | S          | S          | S             | S            | S                  | R                       | R           | S        | R         | R        | R         |
|                                          | URMC 208  | S        | S          | S          | S             | S            | S                  | R                       | R           | S        | S         | S        | R         |
|                                          | URMC 209  | S        | S          | S          | S             | S            | S                  | R                       | R           | S        | R         | R        | R         |
|                                          | URMC 211  | S        | S          | S          | S             | S            | S                  | R                       | R           | D        | R         | R        | R         |
|                                          | URMC 212  | S        | S          | S          | S             | S            | S                  | R                       | R           | R        | R         | I        | R         |
|                                          | URMC 213  | S        | S          | S          | S             | S            | S                  | R                       | R           | R        | R         | I        | R         |
|                                          | URMC 215  | S        | S          | S          | S             | S            | S                  | R                       | R           | S        | R         | R        | R         |
|                                          | URMC 216  | S        | S          | S          | S             | S            | S                  | R                       | R           | S        | R         | S        | S         |
|                                          | URMC 218  | S        | S          | S          | S             | S            | S                  | R                       | R           | S        | R         | R        | R         |
|                                          | URMC 219  | S        | S          | S          | S             | S            | S                  | R                       | R           | S        | R         | R        | R         |
|                                          | URMC 224  | nd       | S          | S          | S             | S            | S                  | R                       | R           | R        | R         | nd       | R         |
|                                          | URMC 225  | S        | S          | S          | S             | S            | S                  | R                       | R           | R        | R         | R        | R         |
| URMC 226                                 | S         | S        | S          | S          | S             | S            | R                  | R                       | R           | R        | I         | I        |           |
| Other URMIC CR-KA strains                | URMC 200  | S        | S          | S          | S             | nd           | S                  | R                       | R           | R        | R         | nd       | R         |
|                                          | URMC 202  | S        | S          | S          | S             | S            | S                  | R                       | R           | S        | R         | R        | R         |
|                                          | URMC 203  | S        | S          | S          | S             | S            | S                  | R                       | R           | S        | R         | R        | R         |
|                                          | URMC 204  | S        | S          | S          | S             | nd           | S                  | R                       | R           | S        | R         | nd       | R         |
|                                          | URMC 210  | S        | S          | S          | S             | nd           | S                  | R                       | R           | S        | R         | nd       | S         |
|                                          | URMC 214  | S        | S          | S          | S             | nd           | S                  | I                       | R           | S        | R         | I        | S         |
|                                          | URMC 217  | S        | S          | S          | R             | nd           | S                  | R                       | R           | S        | R         | I        | S         |
|                                          | URMC 221  | S        | S          | S          | S             | nd           | S                  | S                       | S           | S        | R         | nd       | S         |
|                                          | URMC 222  | S        | S          | S          | S             | S            | S                  | R                       | R           | R        | R         | I        | S         |
| Con                                      | URMC 201  | S        | S          | S          | S             | S            | S                  | S                       | S           | S        | S         | I        | S         |
|                                          | URMC 223  | S        | S          | S          | S             | nd           | S                  | S                       | S           | S        | S         | nd       | S         |

R=Resistant, S= Sensitive, I =Intermediate, D= Dose Dependent, nd=not determined; \*Patient A (1<sup>st</sup> case)-URMC 205; Con: control strains: URMC 223, carbapenem susceptible and URMC 201, intermediate carbapenem resistance

**Table 2. Non-synonymous SNPs in *ampD* gene associated with carbapenem resistance in the URMC *K. aerogenes* isolates**

| Study Isolates                                |                                                                                                                         | Differences in <i>ampD</i> gene relative to wild-type allele |           | Effect on encoded AmpD sequence |         |
|-----------------------------------------------|-------------------------------------------------------------------------------------------------------------------------|--------------------------------------------------------------|-----------|---------------------------------|---------|
|                                               |                                                                                                                         | MS SNPs                                                      | NS SNPs   | Single AA substitutions         | PS      |
| <b>CICU outbreak associated CR-KA strains</b> | URMC 205*, URMC 207, URMC 209, URMC 211, URMC 212, URMC 213, URMC 215, URMC 218, URMC 219, URMC 224, URMC 224, URMC 226 | 482G>A                                                       |           | Arg161His                       |         |
|                                               | URMC 206, URMC 208, URMC 216                                                                                            | 284G>T                                                       |           | Trp95Leu                        |         |
| <b>Outbreak unrelated CR-KA strains</b>       | URMC 200                                                                                                                | 338T>G                                                       |           | Ile113Ser                       |         |
|                                               | URMC 202                                                                                                                |                                                              | 412C>T    |                                 | Gln138X |
|                                               | URMC 204                                                                                                                | 117C>T                                                       |           | Pro39Ser                        |         |
|                                               | URMC 210                                                                                                                | 335C>T                                                       |           | Ser112Leu                       |         |
|                                               | URMC 214                                                                                                                | 280G>A                                                       |           | Ala94Thr                        |         |
|                                               | URMC 217                                                                                                                | 496G>C                                                       |           | Gly166Arg                       |         |
|                                               | URMC 221                                                                                                                | 478A>G, 501C>A                                               |           | Ile160Val, Ala168Asp            |         |
| URMC 222                                      | 492T>G                                                                                                                  |                                                              | Glu164Asp |                                 |         |
| <b>Control strains</b>                        | URMC 201, URMC 223                                                                                                      |                                                              |           |                                 |         |

No sequencing reads mapped to the *ampD* gene in URMC 203.

\*Index patient isolate.

Abbr: SNP: single nucleotide polymorphism, MS: missense, NS: nonsense, AA: amino acids, PS: premature stop codon

**Table 3. Non-synonymous genetic lesions in *omp36* genes and resulting alterations in Omp36 sequence in the URMC *K. aerogenes* isolates**

| Study Isolates                                |                                                                                | Differences in <i>omp36</i> gene sequence relative to wild-type allele |                        |         |                                         | Effect on encoded Omp36 amino acid sequence relative to wild-type sequence |                        |      |           |                                                |
|-----------------------------------------------|--------------------------------------------------------------------------------|------------------------------------------------------------------------|------------------------|---------|-----------------------------------------|----------------------------------------------------------------------------|------------------------|------|-----------|------------------------------------------------|
|                                               |                                                                                | FS                                                                     | HV region (Nt 680-724) | NS SNPs | MS SNPs                                 | FS                                                                         | HV region (AA 226-241) | PS   | Truncated | Single AA substitutions in protein synthesized |
| <b>CICU outbreak associated CR-KA strains</b> | URMC 205*, URMC 207                                                            | +                                                                      | +                      |         | 175A>G, 564T>C, 566A>G                  | pAsp91ThrfsX12                                                             |                        | 102X | +         | Ile59Val                                       |
|                                               | URMC 206, URMC 208, URMC 212, URMC 213, URMC 216, URMC 224, URMC 225, URMC 226 |                                                                        | +                      |         | 175A>G, 564T>C, 566A>G                  |                                                                            | +                      |      |           | Ile59Val, Asp189Gly                            |
|                                               | URMC 209, URMC 211, URMC 215, URMC 218, URMC 219                               |                                                                        | +                      | 184A>T  | 175A>G, 564T>C, 566A>G                  |                                                                            |                        | 62X  | +         | Ile59Val                                       |
| <b>Outbreak unrelated CR-KA strains</b>       | URMC 200, URMC 203, URMC 210, URMC 214                                         |                                                                        | +                      |         | 564T>C, 566A>G, 615 T>G, 834T>C, 835A>G |                                                                            | +                      |      |           | Asp189Gly, Asp205Glu, Asn279Asp                |
|                                               | URMC 202                                                                       | +                                                                      | +                      |         | 564T>C, 566A>G, 615 T>G, 834T>C, 835A>G | pTrp77LysfsX2                                                              |                        | 78X  | +         | Trp77Lys                                       |
|                                               | URMC 204                                                                       | +                                                                      | +                      |         | 564T>C, 566A>G, 615 T>G, 834T>C, 835A>G | pSer304ProfsX21                                                            | +                      | 324X | +         | Asp189Gly, Asp205Glu, Asn279Asp                |
|                                               | URMC 217                                                                       |                                                                        | +                      |         | 564T>C, 566A>G, 569T>A                  |                                                                            |                        | +    |           | Asp189Gly, Phe190Tyr                           |
|                                               | URMC 222                                                                       |                                                                        | +                      |         | 175A>G, 564T>C, 566A>G, 615 T>G         |                                                                            |                        | +    |           | Ile59Val, Asp189Gly, Asp205Glu                 |
| <b>Control strain</b>                         | URMC 201 (intermediate carbapenem R)                                           |                                                                        | +                      |         | 175A>G, 564T>C, 566A>G                  |                                                                            |                        | +    |           | Ile59Val, Asp189Gly                            |

\*Index patient isolate.

Abbr: SNP: single nucleotide polymorphism, NS: nonsense, MS: missense, FS: frame-shift, PS: premature stop codon, HV: hypervariable region, Nt: nucleotides, AA: amino acids

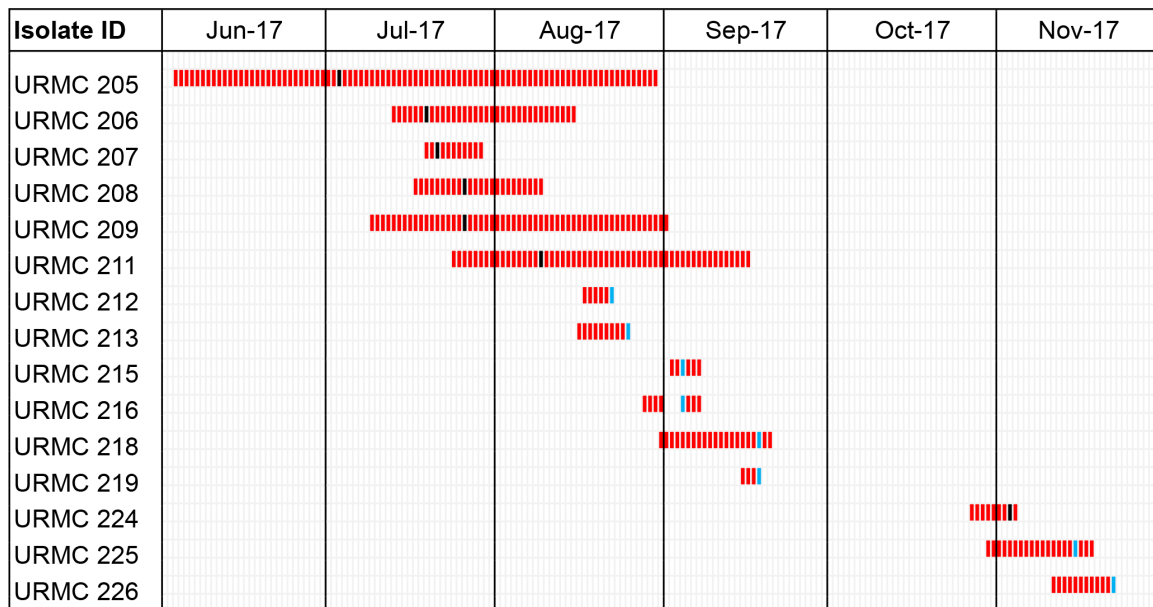

**Fig. 1. Patient occupancy and overlap in CICU ward during the *K. aerogenes* outbreak.** Black bars-first positive CR-KA clinical cultures, blue bars-first positive CR-KA surveillance cultures

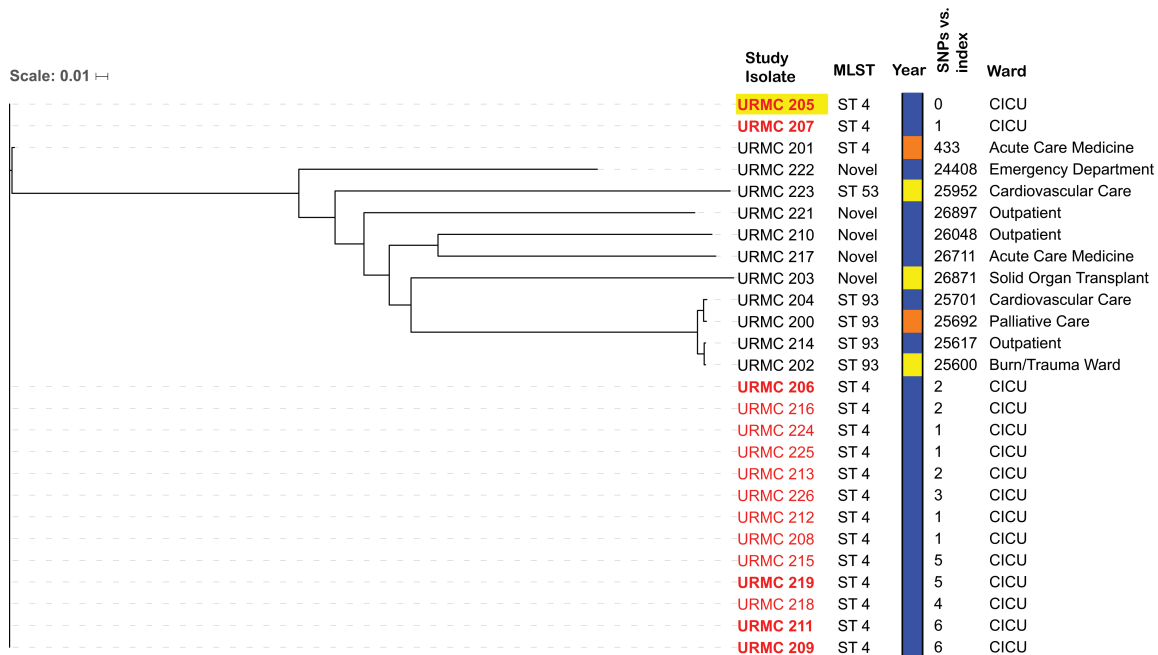

**Fig. 2. Dendrogram showing pairwise SNP differences based phylogenetic relatedness of URM C. aerogenes strains.** Whole genome sequence of *K. aerogenes* KCTC 2190 (ATCC 13048) was used for reference mapping. A total of 28,170 discriminatory high-quality SNPs in the core genomes obtained by the adapted CFSAN pipeline were used to plot the tree (excluding mobile elements and putative recombination sites). CICU outbreak strains: IDs highlighted in red, clinical isolates in bold, patient A isolate (1<sup>st</sup> case) with yellow background. Year strain isolated: orange-2015, yellow-2016, blue-2017. SNP differences relative to patient A shown. Scale bar indicates nucleotide substitutions per site.



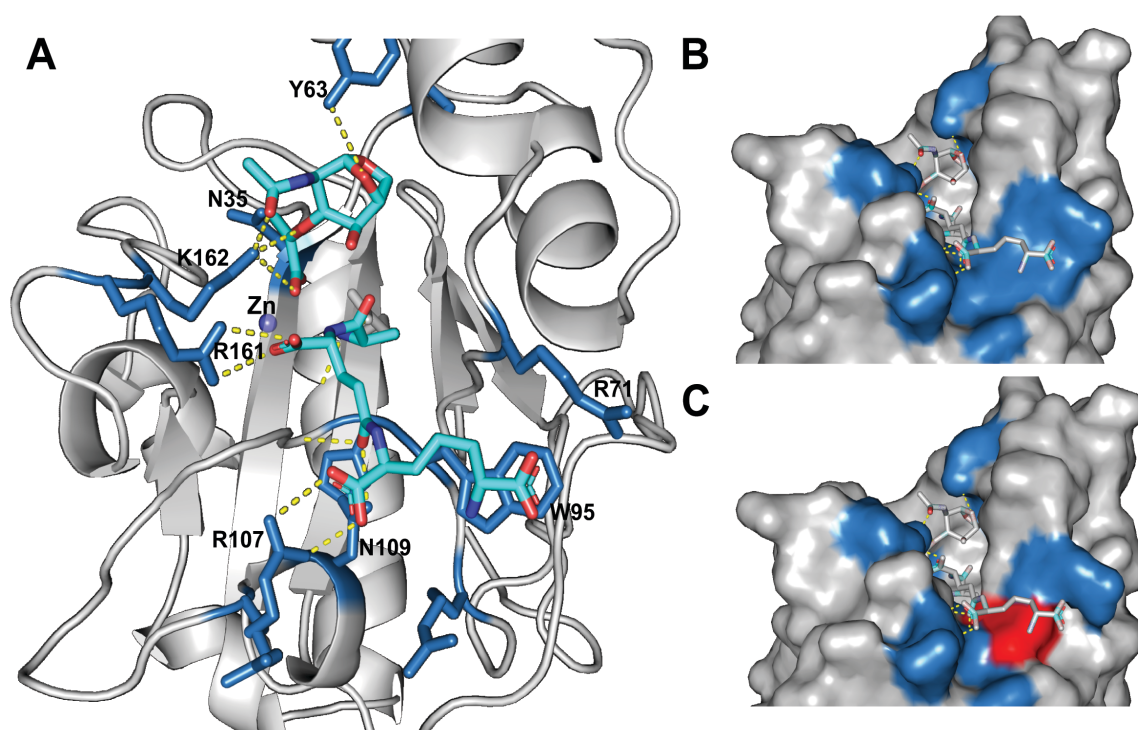

**Fig. 3. Computational modeling of the impact of *ampD* mutations on AmpD in URMIC outbreak CR-KA strains.** A) *K. aerogenes* AmpD modeled on *C. freundii* AmpD structure. Key residues interacting with glycan and peptide portions of ligand are shown. B, C) Surface models of *K. aerogenes* AmpD depicting the wild-type binding surface for the diaminopimelate moiety (W95, top) versus the binding surface of AmpD containing the W95L mutation (blue surfaces indicate amino acid positions from panel A; bottom, altered surface highlighted in red).

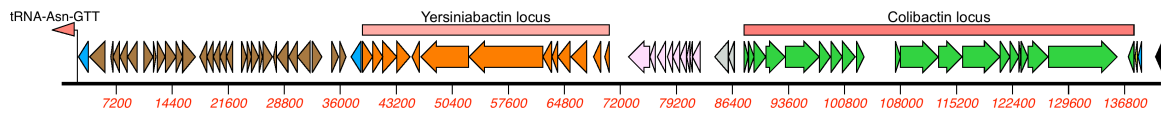

**Fig. 4. Yersiniabactin and colibactin encoding gene loci on integrative conjugative element ICEKp10 in the CICU outbreak CR-KA strains. Blue arrows-integrase encoding genes, brown arrows-Zn<sup>2+</sup>/Mn<sup>2+</sup> modules grey arrows-genes encoding mobilization proteins, pink arrows: vir-T4SS system.**

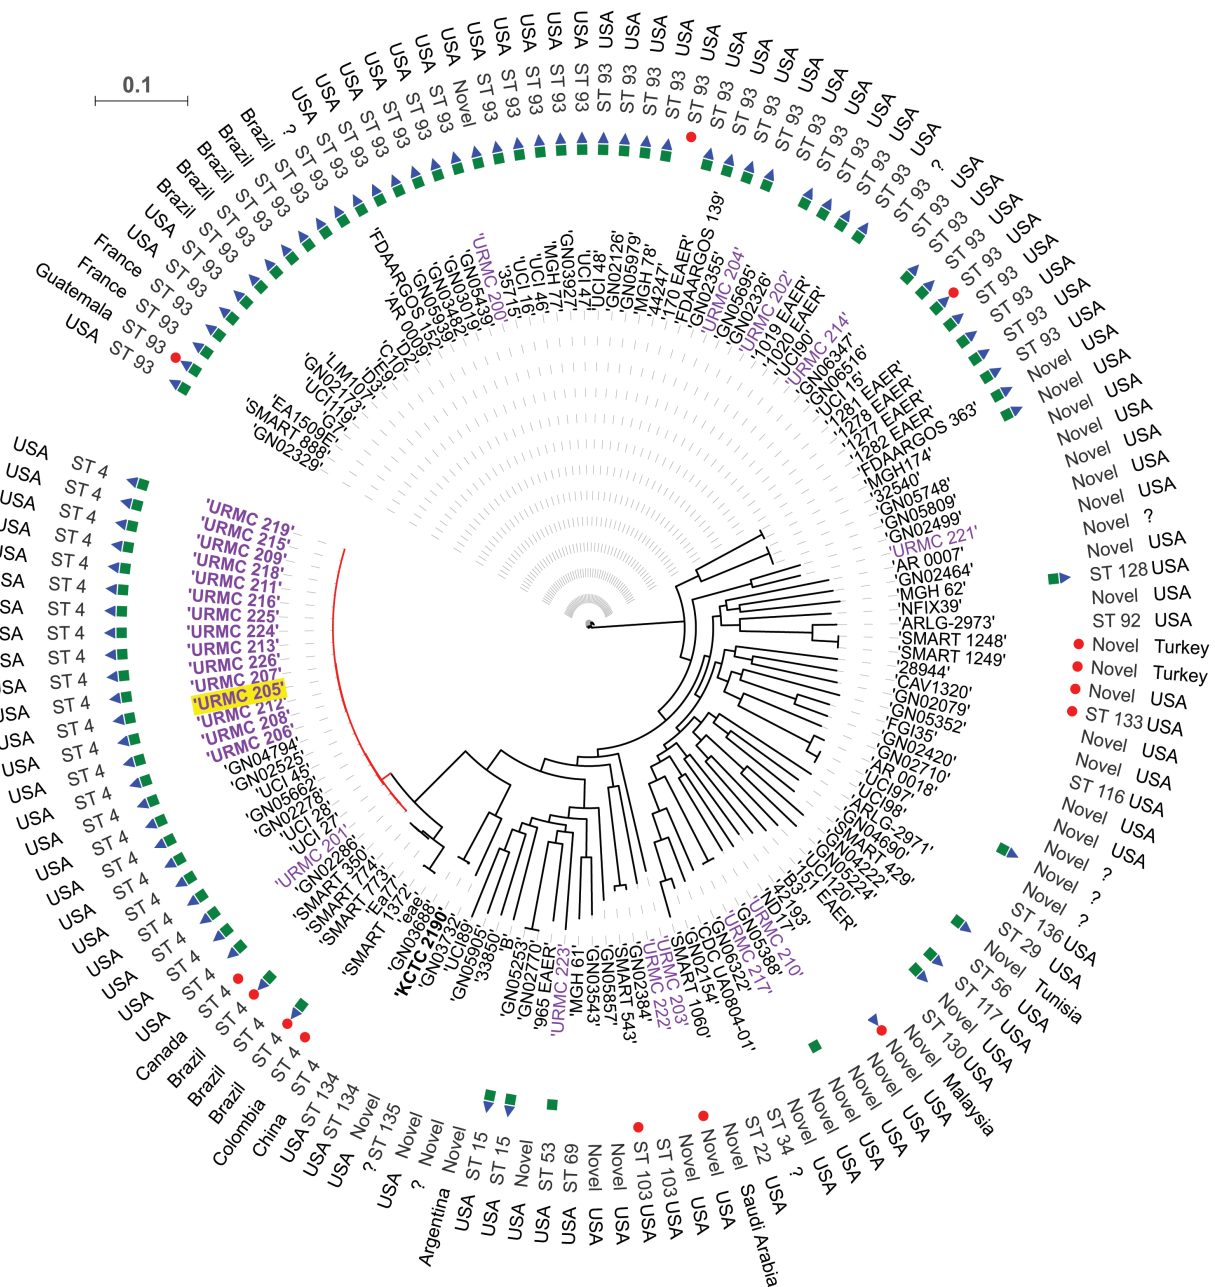

**Fig. 5. Harvest based phylogenomic comparisons of URMC *K. aerogenes* genomes with global *K. aerogenes* genomes.** Discriminatory SNPs based on core genome comparisons were used to plot the tree. URMC study *K. aerogenes* strains in purple (outbreak strains in bold, index patient strain highlighted yellow). Presence of genes encoding yersiniabactin siderophore system (green squares), colibactin synthesis cluster (blue triangles), and carbapenamases (red circles) in assembled genomes shown. Scale bar indicates nucleotide substitutions per site.
